# Supplementary material for: Proliferation of Isoëtalean Lycophytes During the Permo-Triassic Biotic Crises: A Proxy for the State of the Terrestrial Biosphere
Source: Frontiers journal article supplement (doi:10.3389/feart.2021.615370), 2021-03-02
Supplement: Data_Sheet_1.PDF [file Data_Sheet_1.PDF]

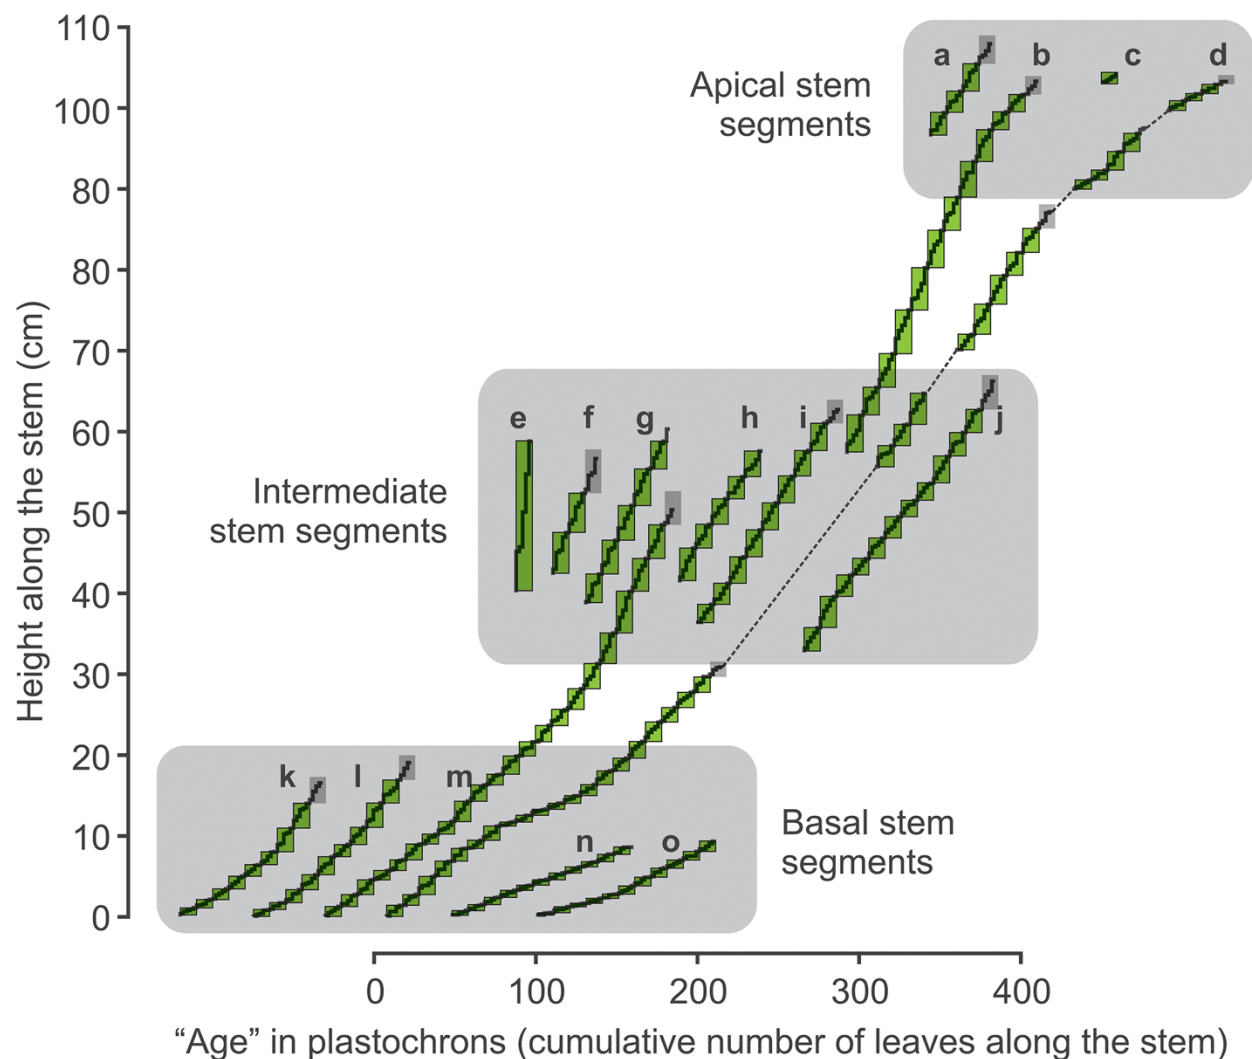

**Supplementary Figure 1.** Variable vertical growth rates of *Pleuromeia sternbergii*. The cumulative number of leaves along the stem (starting with the oldest leaves) is plotted against height. Thus, the slope of the line is the vertical growth rate in cm per plastochron (i.e. the amount of time between the development of consecutive leaf primordia; see Materials and Methods). The green rectangles indicate the amount of vertical growth represented by intervals of 10 consecutive leaves (small grey rectangles at the end of the segments represent extrapolations for incomplete intervals of 10). Lower case letters refer to the fossils in the trace diagrams in Figure 3. Stem segments a-d contain the apex of the stem; segments d and k-o contain the basal part of the stem; e-j represent stem fossils that lack apex and base.

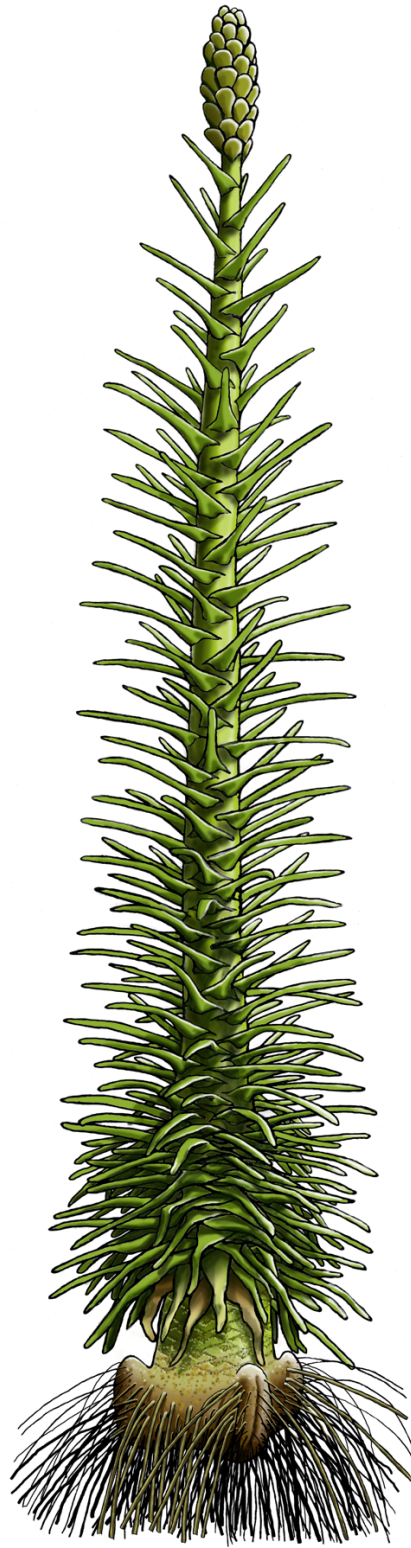

**Supplementary Figure 2.** Reconstructed growth habit of *Pleuromeia sternbergii* (height circa 1.5 m; reconstruction by Ivo Duijnste and Hannah Bonner). Same illustration as in Figure 4A, but at a higher resolution.

**Supplementary Table 1.** Counted Lopingian and Triassic plant taxon occurrences in the fossil data compilation by Nowak et al. (2019) after removal of non-embryophytic palynomorphs and filtering for stage-level chronostratigraphic assignability.

|               | MEGAFOSSIL DATA        |                                |                  | MICROFOSSIL DATA       |                                |                  |
|---------------|------------------------|--------------------------------|------------------|------------------------|--------------------------------|------------------|
|               | Recorded<br>plant taxa | Recorded<br>isoëtalean<br>taxa | %<br>isoëtaleans | Recorded<br>plant taxa | Recorded<br>isoëtalean<br>taxa | %<br>isoëtaleans |
| Rhaetian      | 181                    | 0                              | 0.0              | —                      | —                              | —                |
| Norian        | 116                    | 0                              | 0.0              | 102                    | 12                             | 11.8             |
| Carnian       | 879                    | 11                             | 1.3              | 945                    | 67                             | 7.1              |
| Ladinian      | 2,892                  | 69                             | 2.4              | 13,599                 | 1,084                          | 8.0              |
| Anisian       | 1,335                  | 107                            | 8.0              | 11,581                 | 1,400                          | 12.1             |
| Olenekian     | 662                    | 83                             | 12.5             | 4,090                  | 981                            | 24.0             |
| Induan        | 607                    | 100                            | 16.5             | 10,792                 | 2,389                          | 22.1             |
| Changhsingian | 1,337                  | 6                              | 0.4              | 4,175                  | 105                            | 2.5              |
| Wuchiapingian | 1,874                  | 0                              | 0.0              | 1,278                  | 10                             | 0.8              |
| Total         | 9,883                  | 376                            |                  | 46,562                 | 6,048                          |                  |

**Supplementary Table 2.** Counted Lopingian and Early Triassic plant taxon occurrences in the fossil data compilation by Nowak et al. (2019) after removal of non-embryophytic palynomorphs and filtering for paleogeographic floral province assignability.

|                   |             | MEGAFOSSIL DATA        |                                |                  | MICROFOSSIL DATA       |                                |                  |
|-------------------|-------------|------------------------|--------------------------------|------------------|------------------------|--------------------------------|------------------|
|                   |             | Recorded<br>plant taxa | Recorded<br>isoëtalean<br>taxa | %<br>isoëtaleans | Recorded<br>plant taxa | Recorded<br>isoëtalean<br>taxa | %<br>isoëtaleans |
| EARLY<br>TRIASSIC | (Sub)Angara | 445                    | 81                             | 18.2             | 8,152                  | 2,045                          | 25.1             |
|                   | Cathaysia   | 597                    | 73                             | 12.2             | 1,263                  | 109                            | 8.6              |
|                   | Euramerica  | 270                    | 37                             | 13.7             | 3,061                  | 430                            | 14.0             |
|                   | Gondwana    | 298                    | 26                             | 8.7              | 4,213                  | 1,018                          | 24.2             |
| LOPINGIAN         | (Sub)Angara | 500                    | 8                              | 1.6              | 1,298                  | 79                             | 6.1              |
|                   | Cathaysia   | 2,528                  | 0                              | 0.0              | 1,065                  | 16                             | 1.5              |
|                   | Euramerica  | 921                    | 0                              | 0.0              | 3,707                  | 74                             | 2.0              |
|                   | Gondwana    | 248                    | 0                              | 0.0              | 4,748                  | 172                            | 3.6              |
